# Supplementary material for: Enhanced photoelectric performance of Cu2−xSe nanostructure by doping with In3+
Source: Royal Society of Chemistry journal article supplement (doi:10.1039/c1jm14507j), 2011-12-05
Supplement: c1jm14507j.pdf [file c1jm14507j.pdf]

Electronic Supplementary Information for Journal of Materials Chemistry

**Enhanced photoelectric performance of  $\text{Cu}_{2-x}\text{Se}$  nanostructure**

**by doping with  $\text{In}^{3+}$**

Huanhuan Kou, Yimin Jiang, Jiajia Li, Shengjiao Yu, Chunming Wang

Department of Chemistry, Lanzhou University, Lanzhou 730000, PR China

Phone: +86-0931-891-1895, Fax: +86-0931-891-2582, E-mail: [wangcm@lzu.edu.cn](mailto:wangcm@lzu.edu.cn).

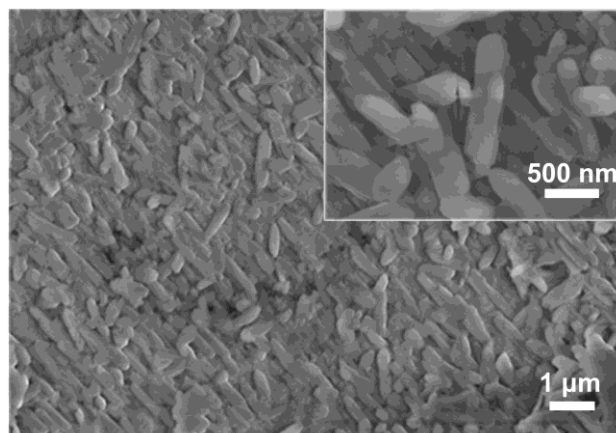

**Fig. S1** SEM image of pure  $\text{Cu}_{2-x}\text{Se}$  electrodeposited onto CNTs/PI membrane for 80 min.

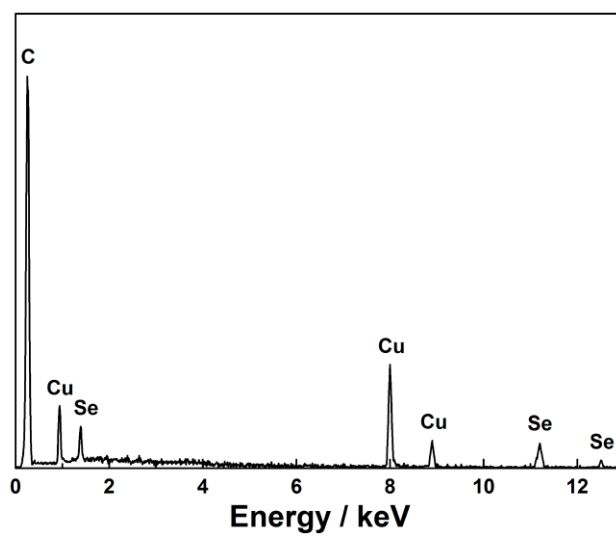

**Fig. S2** EDS spectrum of sample B.
